# Supplementary material
Source: publisher figshare collection journal article supplement (https://acs.figshare.com/ndownloader/files/5109529)
Supplement: Supplementary file 1 [file 5109529]

## Supporting Information

### Cyano-bridged $\text{Mn}^{\text{III}}_3\text{M}^{\text{III}}$ ( $\text{M}^{\text{III}} = \text{Fe}, \text{Cr}$ ) Complexes:

### Synthesis, Structure, and Magnetic Properties

Hitoshi Miyasaka,\* Hitomi Takahashi, Tomokura Madanbashi, Ken-ichi Sugiura,  
Rodolphe Clérac,\* and Hiroyuki Nojiri

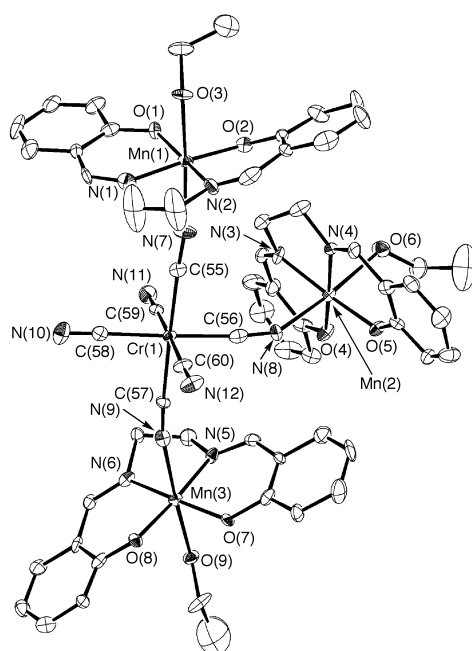

**Figure S1.** ORTEP drawing of  $[\{\text{Mn}(\text{salen})(\text{EtOH})\}_3\{\text{M}(\text{CN})_6\}]\cdot 2\text{MeOH}\cdot\text{H}_2\text{O}$  (**2**) (50 % probability ellipsoid).

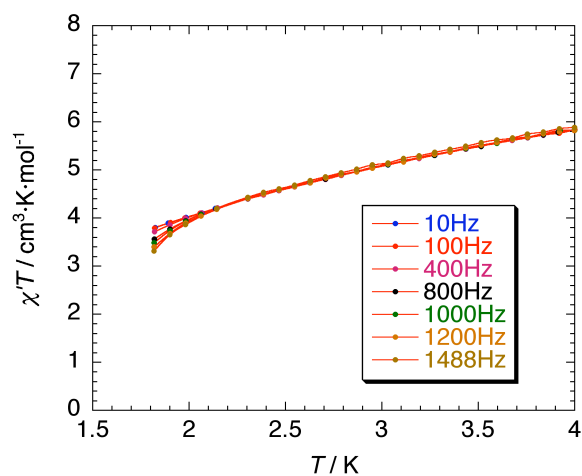

**Figure S2.** Temperature and frequency dependence of  $\chi'T$  of **1** measured at zero dc field and 3 Oe ac oscillating field.

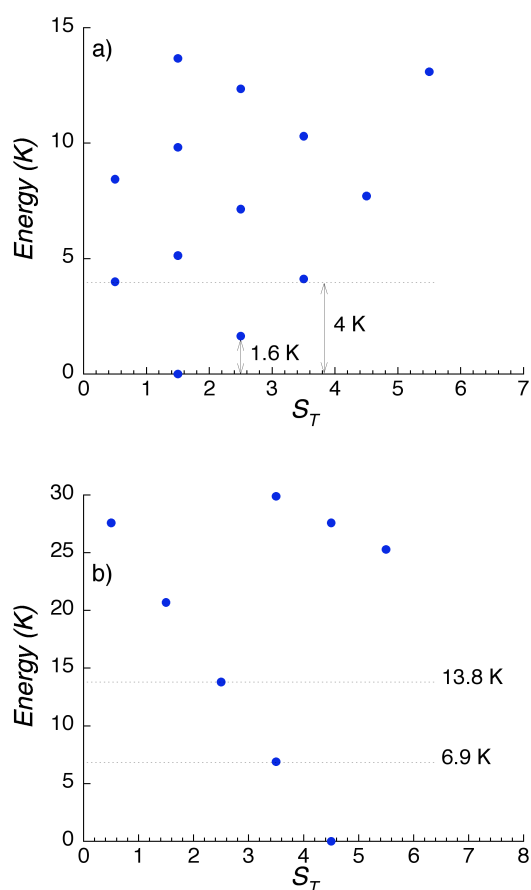

**Figure S3.** Energy diagram of **1** (a) and **2** (b) estimated by using susceptibility-fitting parameters.

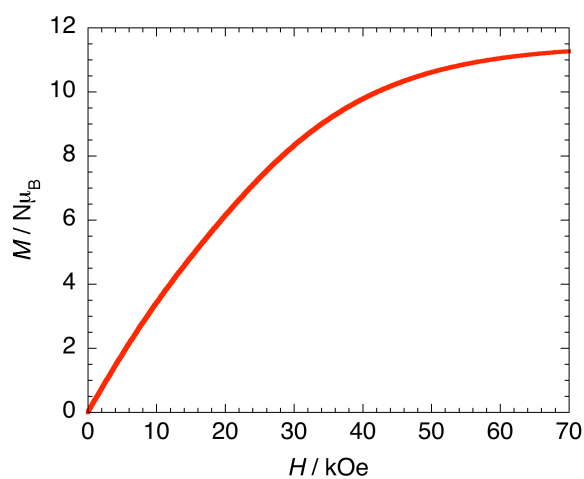

**Figure S4.**  $M(H)$  simulated curve for **1** using the susceptibility-fitting parameters, in which the model was treated as an isotropic spin system without zero-field splitting effect. At 7 T,  $M(H)$  curve reaches at a value  $11.2 \mu_B$ , proving that low-lying excited states were possibly populated by applied fields.
